# Supplementary material
Source: ML conference proceedings conference paper supplement (https://openaccess.thecvf.com/content/CVPR_2020/html/vahid_Butterfly_Transform_An_CVPR_2020_paper.html)
Supplement: Supplementary file 1 [file vahid_Butterfly_Transform_An_CVPR_2020_supplemental.pdf]

## A. Experimental details

Here we explain our experimental setup. For all architectures, we optimize our network by minimizing cross-entropy loss using SGD.

### A.1. MobileNetV1+BFT

We have used weight decay of  $10^{-5}$ . We train for 170 epochs. We have used a constant learning rate 0.5 and decay it by  $\frac{1}{10}$  at epochs 140, 160. For details on width multiplier of MobileNet and input resolution on each experiment look at Table 4.

### A.2. ShuffleNetV2+BFT

We have used weight decay of  $10^{-5}$ . We train for 300 epochs. We start with a learning rate of 0.5 linearly decaying it to 0. All of the pointwise convolutions are replaced by BFT as shown in Figure 6, except the first pointwise convolution with input channel size of 24. For comparing under the similar number of FLOPs we have slightly changed ShuffleNet’s layer width to create ShuffleNetV2-1.25: This is the structure which is used for shuffleNetV2-1.25:

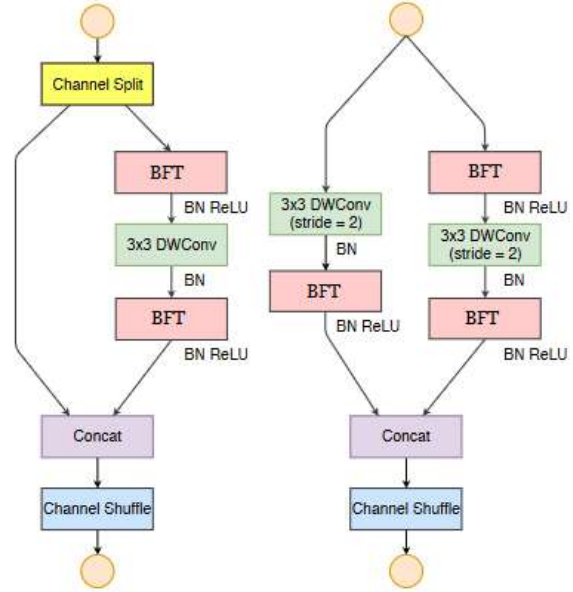

Figure 6:  
ShuffleNetV2+BFT Block

| Layer       | output size    | Kernel | Stride | Repeat | Width |
|-------------|----------------|--------|--------|--------|-------|
| Image       | 224×224        |        |        |        | 3     |
| Conv1       | 112×112        | 3×3    | 2      | 1      | 24    |
| Max pool    | 56×56          | 3×3    | 2      |        |       |
| Stage 2     | 28×28<br>28×28 |        | 2<br>1 | 1<br>3 | 128   |
| Stage 3     | 14×14<br>14×14 |        | 2<br>1 | 1<br>7 | 256   |
| Stage 4     | 7×7<br>7×7     |        | 2<br>1 | 1<br>3 | 1024  |
| Conv 5      | 7×7            | BFT    | 1      | 1      | 1024  |
| Global Pool | 1×1            | 7×7    |        |        |       |
| FC          |                |        |        |        | 1000  |
| FLOPS       |                |        |        |        | 41    |

For details on input resolution on each experiment look at Table 5.

### A.3. MobileNetV3+BFT

We have used weight decay of  $10^{-5}$ . We train for 200 epochs. We start with a warm-up for the first 5 epochs, starting from a learning rate 0.1 and linearly increasing it to 0.5. Then we decay learning rate from 0.5 to 0.0 using a cosine scheme in the remaining 195 epochs. For details on width multiplier and input resolution on each experiment look at Table 6.

| MobileNet |            |       |          | MobileNet+BFT |            |       |          | gain        |
|-----------|------------|-------|----------|---------------|------------|-------|----------|-------------|
| width     | resolution | flops | Accuracy | width         | resolution | flops | Accuracy |             |
| 0.25      | 128        | 14 M  | 41.50    | 1.0           | 96         | 14 M  | 46.58    | <b>5.08</b> |
| 0.25      | 160        | 21 M  | 45.50    | 1.0           | 128        | 23 M  | 52.26    | <b>6.76</b> |
| 0.25      | 192        | 34 M  | 47.70    | 1.0           | 160        | 35 M  | 54.30    | <b>6.60</b> |
|           | 224        | 41 M  | 50.60    |               |            |       |          | <b>3.70</b> |
| 0.50      | 128        | 49 M  | 56.30    | 1.0           | 192        | 51 M  | 57.56    | <b>1.26</b> |
|           |            |       |          | 2.0           | 128        | 52 M  | 58.35    | <b>2.05</b> |
| 0.50      | 192        | 110 M | 61.70    | 2.0           | 192        | 112 M | 63.03    | <b>1.33</b> |
| 0.50      | 224        | 150 M | 63.30    | 2.0           | 224        | 150 M | 64.32    | <b>1.02</b> |

Table 4: Comparison between Mobilenet and Mobilenet+BFT. For comparison under similar number of FLOPs we have used wider channels in MobileNet+BFT.

| ShuffleNetV2 |            |       |          | ShuffleNetV2+BFT |            |       |          | gain        |
|--------------|------------|-------|----------|------------------|------------|-------|----------|-------------|
| width        | resolution | flops | Accuracy | width            | resolution | flops | Accuracy |             |
| 0.50         | 128        | 14 M  | 50.86*   | 1.25             | 128        | 14 M  | 55.26    | <b>4.4</b>  |
| 0.50         | 160        | 21 M  | 55.21*   | 1.25             | 160        | 21 M  | 57.83    | <b>2.62</b> |
| 0.50         | 224        | 41 M  | 59.70*   | 1.25             | 224        | 41 M  | 61.33    | <b>1.63</b> |
|              |            |       | 60.30    |                  |            |       |          | <b>1.03</b> |

Table 5: Comparison between ShuffleNetV2 and ShuffleNetV2+BFT. For comparison under similar number of FLOPs we have used wider channels in ShuffleNetV2+BFT.

| MobileNetV3 |            |       |          | MobileNetV3+BFT |            |       |          | gain        |
|-------------|------------|-------|----------|-----------------|------------|-------|----------|-------------|
| width       | resolution | flops | Accuracy | width           | resolution | flops | Accuracy |             |
| Small-0.35  | 224        | 13 M  | 49.8     | Small-0.5       | 224        | 15 M  | 55.21    | <b>5.41</b> |

Table 6: Comparison between MobileNetV3 and MobileNetV3+BFT. For comparison under similar number of FLOPs we have used wider channels in MobileNetV3+BFT.
